# Supplementary material for: Type 2 diabetes and incidence of cardiovascular diseases: a cohort study in 1·9 million people
Source: PubMed Central journal article supplement — Lancet Diabetes Endocrinol. 2015 Feb;3(2):105–13. doi: 10.1016/S2213-8587(14)70219-0 (PMC4303913; doi:10.1016/s2213-8587(14)70219-0), 2015-02
Supplement: mmc1.pdf [file mmc1.pdf]

## Supplementary appendix

This appendix formed part of the original submission and has been peer reviewed. We post it as supplied by the authors.

Supplement to: Shah AD, Langenberg C, Rapsomaniki E, et al. Type 2 diabetes and incidence of cardiovascular diseases: a cohort study in 1·9 million people. *Lancet Diabetes Endocrinol* 2014; published online Nov 11. [http://dx.doi.org/10.1016/S2213-8587\(14\)70219-0](http://dx.doi.org/10.1016/S2213-8587(14)70219-0).

**Type 2 diabetes and incidence of a wide range of cardiovascular diseases:  
a cohort study in 1·9 million people**

*Supplementary material*

**Table of Contents**

|                                                                                                                                                                             |           |
|-----------------------------------------------------------------------------------------------------------------------------------------------------------------------------|-----------|
| <b>Supplementary Methods.....</b>                                                                                                                                           | <b>2</b>  |
| CALIBER program: study data sources.....                                                                                                                                    | 2         |
| Definition of diabetes.....                                                                                                                                                 | 2         |
| Definition of endpoints.....                                                                                                                                                | 2         |
| Sample size.....                                                                                                                                                            | 3         |
| Multiple imputation.....                                                                                                                                                    | 3         |
| Survival analysis and competing risks.....                                                                                                                                  | 3         |
| <b>Supplementary Tables.....</b>                                                                                                                                            | <b>4</b>  |
| Table S1. Inclusion criteria and endpoints in recent trials in type 2 diabetes.....                                                                                         | 4         |
| Table S2. Age and sex-specific prevalence of diabetes recorded in CALIBER at study entry.....                                                                               | 5         |
| Table S3. Distribution of events, time to event and age at event for initial presentation of cardiovascular disease among patients with no diabetes or type 2 diabetes..... | 5         |
| Table S4. Cumulative incidence of initial presentation of cardiovascular diseases at age 80 for patients with type 2 diabetes or no diabetes at age 40.....                 | 6         |
| Table S5. Hazard ratios obtained by analyses using different levels of adjustment.....                                                                                      | 6         |
| Table S6. Hazard ratios from complete case analyses.....                                                                                                                    | 7         |
| Table S7. Hazard ratios from secondary analyses.....                                                                                                                        | 8         |
| Table S8. Hazard ratios for composite endpoints.....                                                                                                                        | 8         |
| <b>Supplementary Figures.....</b>                                                                                                                                           | <b>9</b>  |
| Figure S1. Patient flow diagram and classification of baseline diabetes status.....                                                                                         | 9         |
| A. CALIBER phenotype algorithm for diabetes.....                                                                                                                            | 9         |
| B. Patient flow diagram.....                                                                                                                                                | 9         |
| Figure S2. Association of type 2 diabetes with initial presentation of cardiovascular diseases using different adjustments.....                                             | 10        |
| Figure S3. Adjusted hazard ratios for type 2 diabetes and initial presentations of cardiovascular diseases by age group.....                                                | 11        |
| Figure S4. Association of type 2 diabetes with initial presentation of cardiovascular diseases by level of glycaemic control.....                                           | 12        |
| Figure S5. Association of type 2 diabetes with initial presentation of cardiovascular diseases using different subsets of the data sources.....                             | 13        |
| Figure S6. Schoenfeld residuals and tests for proportional hazards.....                                                                                                     | 14        |
| <b>References.....</b>                                                                                                                                                      | <b>15</b> |

## Supplementary Methods

### CALIBER program: study data sources

The CALIBER<sup>1</sup> (Cardiovascular disease research using Linked Bespoke studies and Electronic Records) research platform contains linked electronic health records from four data sources in England:

1. Primary care data from 225 general practices in the Clinical Practice Research Datalink (CPRD).<sup>2</sup> CPRD provides primary care data on demographics, ethnicity, health behaviours, diagnoses, investigations, procedures and prescriptions. Diagnoses are coded using the Read Clinical Terminology. (Read Terms are a major component of the SNOMED-CT terminology).
2. Hospital Episodes Statistics (HES), containing details of hospital admissions.<sup>3</sup> Diagnoses are coded using the International Statistical Classification of Diseases and Health Related Problems, 10th revision (ICD-10); interventions are coded using the Office of the Population Censuses and Surveys Classification of Interventions and Procedures (OPCS). Ethnicity as recorded during hospital attendances is also included in HES.
3. Details of acute coronary syndromes from the Myocardial Ischaemia National Audit Project registry (MINAP).<sup>4</sup>
4. Date and ICD-10 coded cause of death from the Office for National Statistics (ONS) death registry. The index of multiple deprivation according to the patient's area of residence was also obtained from ONS.<sup>5</sup>

### Definition of diabetes

Patients were defined as diabetic at baseline (type 1, type 2 or uncertain type) based on coded diagnoses recorded in CPRD or HES on or before study entry (Figure S1). Lists of Read and ICD-10 diagnostic codes which convey diabetic status are curated on the CALIBER data portal (<https://www.caliberresearch.org/portal/chapter/6>).

The aim of this algorithm is to identify patients with type 2 diabetes. The majority of diabetic patients in this cohort have type 2 diabetes, and we are not aiming to identify all patients with type 1 diabetes (this algorithm would not be suitable for a study focusing on type 1 diabetes). Our algorithm does not use any information after study entry to classify patients, in order to reduce immortal time bias. However this bias is not eliminated completely because specific type 1 or type 2 codes may have been entered retrospectively only for patients who survived.

Our algorithm leaves many patients with an unclassified type of diabetes. However, rather than using a more complex algorithm, we carried out sensitivity analyses with different definitions (e.g. the type 2 definition or any diabetes).

### Definition of endpoints

Cardiovascular phenotype definitions based on the CALIBER data sources are curated on the CALIBER data portal ([www.caliberresearch.org/portal](http://www.caliberresearch.org/portal)).

Stable angina was defined by a coded diagnosis in primary or secondary care of ischaemic chest pain or stable angina, a positive myocardial ischaemia test, two or more prescriptions of antianginal medication, or coronary revascularisation.

Unstable angina was defined as a primary or secondary care diagnosis of unstable angina, or an acute coronary syndrome without myocardial infarction recorded in the disease registry.

Coronary disease not further specified is a non-specific diagnosis of ischaemic or coronary heart disease in primary or secondary care that does not fall into one of the more specific categories. It was not included among the 12 diseases in the main displays of hazard ratios, but for cumulative incidence calculations it was combined with unstable angina.

Non-fatal myocardial infarction was defined as a disease registry diagnosis of an acute coronary syndrome with elevated troponin, or a primary or secondary care diagnosis of myocardial infarction.

Unheralded coronary death was death with the primary cause certified as coronary heart disease, and no prior history of cardiovascular disease. Patients with myocardial infarction who died on the day of their infarct were considered to have unheralded coronary death.

Heart failure was defined by coded diagnoses in primary care, secondary care and death certificates.

Arrhythmia or sudden cardiac death was a composite of ventricular arrhythmias, cardioversion procedures, implantable cardioverter defibrillator, and sudden cardiac death. It was defined using diagnoses and procedure codes in primary care, secondary care and death certificates.

Transient ischaemic attack was defined by coded diagnoses in primary or secondary care.

Ischaemic stroke was defined using coded diagnoses in primary care, secondary care and death certificates. Patients with a procedure code for carotid endarterectomy within 90 days of a stroke of unspecified type were considered to have ischaemic stroke.

'Stroke not further specified' is a diagnosis of stroke which does not state it is ischaemic or haemorrhagic. This clinical event was not included among the 12 diseases in the main displays of hazard ratios, but for cumulative incidence calculations it was combined with ischaemic stroke.

Subarachnoid haemorrhage was defined by coded diagnoses in primary care, secondary care and death certificates.

Intracerebral haemorrhage was defined by coded diagnoses in primary care, secondary care and death certificates.

Peripheral arterial disease includes intermittent claudication, limb ischaemia or gangrene due to atherosclerotic disease in the arteries of the legs. It was defined by coded diagnoses and procedures in primary care, secondary care and death certificates.

Abdominal aortic aneurysm was defined by coded diagnoses and procedures in primary care, secondary care and death certificates.

### **Sample size**

We used all eligible patients in the CALIBER database for this study. We carried out a power calculation for estimating the age-adjusted hazard ratio between type 2 diabetes and haemorrhagic stroke, one of the less common endpoints, using the powerSurvEpi package in R.<sup>6</sup> Based on our dataset, with 1.8% of patients having type 2 diabetes and correlation coefficient between type 2 diabetes and age  $\rho^2 = 0.018$ , a sample size of 1 000 000 would give 76% power to detect a hazard ratio of 1.5 with a type I error rate of 5%, and a sample size of 1 500 000 would give 90% power.

### **Multiple imputation**

Multiple imputation was implemented using the mice<sup>7</sup> algorithm in the statistical package R, to replace missing values in exposure and risk factor variables. Imputation models were estimated separately for men and women and included:

1. All the baseline covariates used in the main analysis (age, quadratic age, sex, body mass index, deprivation, high density lipoprotein cholesterol, total cholesterol, systolic blood pressure, smoking status, statins and antihypertensive prescriptions);
2. Prior (between 14 and 4 years before study entry) and post (between 0 and 1 year after study entry) averages of continuous covariates in the main analysis;
3. Baseline measurements of covariates not considered in the main analysis (diastolic blood pressure, alcohol intake, white cell count, haemoglobin, creatinine, alanine aminotransferase);
4. Baseline medications (low-dose aspirin, loop diuretics, oral contraceptives and hormone replacement therapy);
5. Coexisting medical conditions (history of depression, cancer, renal disease, liver disease and chronic obstructive pulmonary disease);
6. The Nelson-Aalen hazard and the event status for each endpoint analysed in the data.<sup>8</sup>

Non-normally distributed variables were log-transformed for imputation and exponentiated back to their original scale for analysis. Five multiply imputed datasets were generated, and Cox models were fitted to each dataset. Coefficients were combined using Rubin's rules. The Kolmogorov-Smirnov test was used to compare the distribution of observed versus imputed log-transformed covariates.

### **Survival analysis and competing risks**

We carried out survival analysis to describe and model the first occurrence of any cardiovascular disease. A patient's follow-up ended when they experienced one of the cardiovascular endpoints or when they were censored. Subsequent events (e.g. MI occurring after stable angina) were not analysed.

To describe the incidence of each initial presentation over time we constructed cumulative incidence curves, taking into account the other possible initial presentations as competing events. Normal-based confidence intervals were constructed based on Greenwood's variance formula, as implemented in the R prodlim package.

For multivariable modelling we considered using Cox models (for modelling cause-specific hazards) or the Fine and Gray model (to compare cumulative incidence curves by modelling subdistribution hazards). As the aim of this study was observational epidemiology – to explore associations rather than predict risk – we considered cause specific hazard ratios to be appropriate quantities to estimate. They should be interpreted together with cumulative incidence curves but cannot be used to predict cumulative incidence. We also found the Fine and Gray model to be more computationally intensive, and it would require significant software engineering and/or computing time to apply it to the large dataset used in these analyses. We used follow-up time as the timescale for the Cox models.

Supplementary Tables

Table S1. Inclusion criteria and endpoints in recent trials in type 2 diabetes

| Ref | Author, year, study          | Intervention                                     | Inclusion criteria                                                                                                                                                                                                                                                                                       | Exclusion criteria                                                                                                                                                                              | Components of primary outcome |                 |                       |                            |                 |
|-----|------------------------------|--------------------------------------------------|----------------------------------------------------------------------------------------------------------------------------------------------------------------------------------------------------------------------------------------------------------------------------------------------------------|-------------------------------------------------------------------------------------------------------------------------------------------------------------------------------------------------|-------------------------------|-----------------|-----------------------|----------------------------|-----------------|
|     |                              |                                                  |                                                                                                                                                                                                                                                                                                          |                                                                                                                                                                                                 | Nonfatal MI                   | Nonfatal stroke | Cardio-vascular death | Hospitalized heart failure | Unstable angina |
| 9   | ACCORD Study Group 2008      | Intensive or standard HbA1c targets              | 1. Type 2 diabetes<br>2. HbA1c $\geq$ 7.5%<br>3. Either:<br>a. Aged 40-79 with cardiovascular disease, OR<br>b. Aged 55-79 with anatomical evidence of significant atherosclerosis, albuminuria, left ventricular hypertrophy, or at least two of: dyslipidemia, hypertension, current smoking, obesity. | Frequent or serious hypoglycaemic events, unwillingness to do home monitoring of glucose or inject insulin, BMI > 45 kg/m <sup>2</sup> , serum creatinine > 1.5 mg/dL, other serious illness    | Yes                           | Yes             | Yes                   |                            |                 |
| 10  | Parving 2012 (ALTITUDE)      | Aliskiren versus placebo                         | 1. Type 2 diabetes<br>2. Age $\geq$ 35<br>3. Microalbuminuria, macroalbuminuria, or eGFR 30-60 mL/min/1.73m <sup>2</sup> and MI, stroke, heart failure or coronary artery disease                                                                                                                        | Unstable serum creatinine, NHYA class III or IV heart failure, renal artery stenosis, malignancy in the past 5 years, valvular heart disease                                                    | Yes                           | Yes             | Yes                   | Yes                        |                 |
| 11  | Green 2013 (TECOS)           | Sitagliptin versus placebo                       | 1. Type 2 diabetes<br>2. Age $\geq$ 50<br>3. HbA1c 6.5% to 8.0%<br>4. History of MI, ischaemic stroke, revascularisation, carotid stenosis, or peripheral arterial disease<br>5. On a stable dose of insulin or oral antidiabetic drugs                                                                  | Liver cirrhosis, severe hypoglycaemia, life expectancy < 2 years, eGFR < 30 mL/min/1.73m <sup>2</sup>                                                                                           | Yes                           | Yes             | Yes                   |                            | Yes             |
| 12  | Scirica 2013 (SAVOR-TIMI 53) | Saxagliptin versus placebo                       | 1. Type 2 diabetes<br>2. HbA1c 6.5% to 12.0%<br>3. Either:<br>a. Age $\geq$ 40 and ischaemic heart disease, peripheral vascular disease or ischaemic stroke, OR<br>b. Age $\geq$ 55 (men) or 60 (women) and dyslipidemia, hypertension, or smoking                                                       | Life expectancy < 5 years, MI or stroke within the past 2 months, renal transplant or dialysis, HIV, long term oral steroid treatment, BMI > 50 kg/m <sup>2</sup> , sustained BP > 180/100 mmHg | Yes                           | Yes             | Yes                   |                            |                 |
| 13  | Home 2007 (RECORD)           | Rosiglitazone versus metformin and sulphonylurea | 1. Type 2 diabetes<br>2. Aged 40-75 years<br>3. BMI > 25 kg/m <sup>2</sup><br>4. HbA1c 7.0% to 9.0% while on maximum dose of sulphonylurea or metformin                                                                                                                                                  | Use of other antidiabetic drugs, major cardiovascular event in previous 3 months, heart failure, renal impairment, uncontrolled hypertension                                                    | Yes                           | Yes             | Yes                   | Yes                        | Yes             |
| 14  | Young 2009 (DIAD)            | Screening for coronary artery disease            | 1. Onset of type 2 diabetes at age 30 years or older with no history of ketoacidosis<br>2. Age 50-75 at enrollment                                                                                                                                                                                       | History of coronary disease or angina, limited life expectancy                                                                                                                                  | Yes                           |                 | Yes                   |                            |                 |

Abbreviations: BMI, body mass index; eGFR, estimated glomerular filtration rate; MI, myocardial infarction

**Table S2. Age and sex-specific prevalence of diabetes recorded in CALIBER at study entry**

The total number of patients was 2 135 617, and included patients with pregnancy or prior history of cardiovascular disease which were excluded in the main analysis.

| Sex   | Age group | Number of patients | Percentage of patients with diabetes mellitus at baseline (95% CI) |                  |                  |                              |
|-------|-----------|--------------------|--------------------------------------------------------------------|------------------|------------------|------------------------------|
|       |           |                    | Any diabetes                                                       | Type 1 diabetes  | Type 2 diabetes  | Diabetes of unspecified type |
| Men   | 30–40     | 420 975            | 0.87 (0.85–0.90)                                                   | 0.47 (0.45–0.49) | 0.28 (0.26–0.30) | 0.13 (0.12–0.14)             |
|       | 40–50     | 215 607            | 2.25 (2.19–2.32)                                                   | 0.50 (0.47–0.53) | 1.37 (1.32–1.42) | 0.38 (0.36–0.41)             |
|       | 50–60     | 170 679            | 4.41 (4.32–4.51)                                                   | 0.45 (0.42–0.48) | 3.24 (3.16–3.33) | 0.73 (0.69–0.77)             |
|       | 60–70     | 119 507            | 8.31 (8.15–8.46)                                                   | 0.52 (0.48–0.56) | 6.32 (6.18–6.46) | 1.47 (1.40–1.54)             |
|       | 70–80     | 80 614             | 10.5 (10.3–10.8)                                                   | 0.53 (0.48–0.58) | 7.89 (7.71–8.08) | 2.12 (2.03–2.23)             |
|       | ≥80       | 38 991             | 9.96 (9.66–10.3)                                                   | 0.39 (0.33–0.46) | 7.32 (7.06–7.58) | 2.25 (2.10–2.40)             |
| Women | 30–40     | 411 996            | 0.77 (0.74–0.80)                                                   | 0.35 (0.33–0.37) | 0.25 (0.23–0.26) | 0.17 (0.16–0.19)             |
|       | 40–50     | 198 619            | 1.52 (1.47–1.57)                                                   | 0.34 (0.31–0.37) | 0.90 (0.86–0.95) | 0.28 (0.25–0.30)             |
|       | 50–60     | 166 467            | 2.90 (2.82–2.98)                                                   | 0.34 (0.31–0.37) | 2.03 (1.96–2.10) | 0.53 (0.49–0.56)             |
|       | 60–70     | 123 553            | 5.79 (5.66–5.93)                                                   | 0.36 (0.33–0.40) | 4.37 (4.26–4.49) | 1.06 (1.00–1.11)             |
|       | 70–80     | 103 284            | 7.82 (7.66–7.98)                                                   | 0.42 (0.38–0.46) | 5.70 (5.56–5.84) | 1.70 (1.62–1.78)             |
|       | ≥80       | 85 325             | 7.69 (7.51–7.87)                                                   | 0.31 (0.27–0.35) | 5.59 (5.43–5.74) | 1.79 (1.71–1.88)             |

**Table S3. Distribution of events, time to event and age at event for initial presentation of cardiovascular disease among patients with no diabetes or type 2 diabetes**

| Initial presentation of cardiovascular disease | No diabetes (107 501 events) |                              |                             | Type 2 diabetes (6137 events) |                              |                             |
|------------------------------------------------|------------------------------|------------------------------|-----------------------------|-------------------------------|------------------------------|-----------------------------|
|                                                | % of events                  | Median time to event (years) | Median age at event (years) | % of events                   | Median time to event (years) | Median age at event (years) |
| Stable angina                                  | 11.4                         | 3.2                          | 67.0                        | 11.9                          | 2.5                          | 68.6                        |
| Unstable angina                                | 4.9                          | 4.5                          | 63.1                        | 4.0                           | 2.8                          | 64.7                        |
| Coronary disease not further specified         | 9.3                          | 4.4                          | 67.3                        | 10.2                          | 3.3                          | 67.4                        |
| Non-fatal myocardial infarction                | 14.1                         | 4.7                          | 66.7                        | 11.5                          | 3.4                          | 71.1                        |
| Unheralded coronary death                      | 4.7                          | 5.1                          | 76.2                        | 4.2                           | 4.1                          | 77.0                        |
| Heart failure                                  | 12.2                         | 3.6                          | 79.8                        | 14.1                          | 3.1                          | 76.9                        |
| Arrhythmia or sudden cardiac death             | 3.0                          | 5.0                          | 67.1                        | 1.6                           | 4.0                          | 68.3                        |
| Transient ischaemic attack                     | 10.2                         | 4.0                          | 74.3                        | 8.4                           | 3.4                          | 75.2                        |
| Ischaemic stroke                               | 5.2                          | 5.5                          | 76.4                        | 5.1                           | 4.0                          | 76.0                        |
| Stroke not further specified                   | 9.4                          | 3.4                          | 79.7                        | 10.3                          | 2.5                          | 78.3                        |
| Subarachnoid haemorrhage                       | 1.2                          | 4.4                          | 57.3                        | 0.2                           | 2.8                          | 74.4                        |
| Intracerebral haemorrhage                      | 2.1                          | 4.8                          | 74.0                        | 1.4                           | 4.2                          | 74.7                        |
| Peripheral arterial disease                    | 9.4                          | 4.4                          | 70.1                        | 16.2                          | 3.5                          | 71.7                        |
| Abdominal aortic aneurysm                      | 2.8                          | 5.0                          | 76.2                        | 1.0                           | 4.5                          | 77.8                        |
| Overall                                        | 100.0                        | 4.2                          | 72.0                        | 100.0                         | 3.2                          | 72.6                        |

**Table S4. Cumulative incidence of initial presentation of cardiovascular diseases at age 80 for patients with type 2 diabetes or no diabetes at age 40**

Cumulative incidences expressed as percentages (95% CI), taking into account risk of competing events

| Cardiovascular disease initially presenting as:                           | Women                   |                         | Men                     |                         |
|---------------------------------------------------------------------------|-------------------------|-------------------------|-------------------------|-------------------------|
|                                                                           | No diabetes             | Type 2 diabetes         | No diabetes             | Type 2 diabetes         |
| Stable angina                                                             | 4.5 (4.4–4.6)           | 10.1 (8.7–11.5)         | 5.7 (5.5–5.8)           | 9.5 (8.4–10.7)          |
| Unstable angina or coronary disease not further specified                 | 5.2 (5.1–5.3)           | 11.6 (10.0–13.2)        | 7.1 (6.9–7.3)           | 13.1 (11.7–14.5)        |
| Non-fatal myocardial infarction                                           | 3.4 (3.3–3.5)           | 6.0 (4.9–7.2)           | 8.0 (7.8–8.1)           | 11.4 (9.9–12.8)         |
| Unheralded coronary death                                                 | 0.9 (0.9–1.0)           | 1.5 (0.9–2.0)           | 2.2 (2.1–2.3)           | 2.4 (1.9–2.9)           |
| Heart failure                                                             | 3.3 (3.1–3.4)           | 6.4 (5.4–7.3)           | 3.7 (3.6–3.9)           | 6.1 (5.2–6.9)           |
| Arrhythmia or sudden cardiac death                                        | 0.9 (0.8–1.0)           | 0.7 (0.4–1.0)           | 1.7 (1.6–1.8)           | 1.8 (1.2–2.4)           |
| Transient ischaemic attack                                                | 3.6 (3.5–3.7)           | 4.1 (3.3–4.9)           | 3.8 (3.7–3.9)           | 3.9 (3.3–4.6)           |
| Ischaemic or unspecified stroke                                           | 3.9 (3.8–4.1)           | 7.3 (6.2–8.5)           | 4.7 (4.6–4.9)           | 6.1 (5.3–6.9)           |
| Subarachnoid haemorrhage                                                  | 0.6 (0.5–0.6)           | 0.2 (0.0–0.4)           | 0.3 (0.3–0.4)           | 0.0 (0.0–0.1)           |
| Intracerebral haemorrhage                                                 | 0.7 (0.6–0.7)           | 0.4 (0.2–0.6)           | 0.8 (0.7–0.8)           | 0.8 (0.5–1.1)           |
| Peripheral arterial disease                                               | 3.2 (3.1–3.3)           | 9.7 (8.4–11.1)          | 4.5 (4.4–4.7)           | 11.7 (10.5–13.0)        |
| Abdominal aortic aneurysm                                                 | 0.5 (0.5–0.6)           | 0.1 (0.0–0.2)           | 1.7 (1.6–1.8)           | 0.6 (0.4–0.8)           |
| <b>All cardiovascular presentations</b>                                   | <b>30.7 (30.3–31.0)</b> | <b>58.2 (54.9–61.4)</b> | <b>44.3 (43.8–44.7)</b> | <b>67.4 (64.4–70.4)</b> |
| Death from other causes without any cardiovascular disease prior to death | 14.7 (14.5–15.0)        | 12.4 (11.0–13.8)        | 16.4 (16.2–16.6)        | 11.9 (10.7–13.1)        |

**Table S5. Hazard ratios obtained by analyses using different levels of adjustment**

| Initial presentation                   | Primary analysis (adjusted for age, sex, risk factors, statins and antihypertensives) |          | Adjusted for age, sex and risk factors |          | Adjusted for age and sex only |          |
|----------------------------------------|---------------------------------------------------------------------------------------|----------|----------------------------------------|----------|-------------------------------|----------|
|                                        | Hazard ratio (95% CI)                                                                 | P value  | Hazard ratio (95% CI)                  | P value  | Hazard ratio (95% CI)         | P value  |
| Stable angina                          | 1.62 (1.49–1.77)                                                                      | < 0.0001 | 1.79 (1.64–1.95)                       | < 0.0001 | 1.93 (1.79–2.08)              | < 0.0001 |
| Unstable angina                        | 1.53 (1.32–1.76)                                                                      | < 0.0001 | 1.71 (1.49–1.97)                       | < 0.0001 | 1.84 (1.62–2.10)              | < 0.0001 |
| Coronary disease not further specified | 1.58 (1.45–1.73)                                                                      | < 0.0001 | 1.93 (1.76–2.11)                       | < 0.0001 | 2.11 (1.95–2.29)              | < 0.0001 |
| Non-fatal myocardial infarction        | 1.54 (1.42–1.67)                                                                      | < 0.0001 | 1.50 (1.38–1.62)                       | < 0.0001 | 1.57 (1.46–1.70)              | < 0.0001 |
| Unheralded coronary death              | 1.43 (1.23–1.65)                                                                      | < 0.0001 | 1.39 (1.20–1.60)                       | < 0.0001 | 1.48 (1.31–1.68)              | < 0.0001 |
| Heart failure                          | 1.56 (1.45–1.69)                                                                      | < 0.0001 | 1.58 (1.47–1.70)                       | < 0.0001 | 1.80 (1.68–1.93)              | < 0.0001 |
| Arrhythmia or sudden cardiac death     | 0.95 (0.76–1.19)                                                                      | 0.65     | 0.99 (0.80–1.24)                       | 0.94     | 1.12 (0.92–1.37)              | 0.26     |
| Transient ischaemic attack             | 1.45 (1.31–1.60)                                                                      | < 0.0001 | 1.40 (1.27–1.55)                       | < 0.0001 | 1.42 (1.30–1.55)              | < 0.0001 |
| Ischaemic stroke                       | 1.72 (1.52–1.95)                                                                      | < 0.0001 | 1.68 (1.49–1.91)                       | < 0.0001 | 1.72 (1.53–1.93)              | < 0.0001 |
| Stroke not further specified           | 1.64 (1.48–1.81)                                                                      | < 0.0001 | 1.64 (1.48–1.82)                       | < 0.0001 | 1.77 (1.63–1.92)              | < 0.0001 |
| Subarachnoid haemorrhage               | 0.48 (0.26–0.89)                                                                      | 0.020    | 0.48 (0.26–0.89)                       | 0.020    | 0.45 (0.25–0.81)              | 0.0077   |
| Intracerebral haemorrhage              | 1.28 (1.02–1.62)                                                                      | 0.035    | 1.18 (0.94–1.49)                       | 0.15     | 1.20 (0.97–1.50)              | 0.099    |
| Peripheral arterial disease            | 2.98 (2.76–3.22)                                                                      | < 0.0001 | 3.07 (2.84–3.32)                       | < 0.0001 | 3.14 (2.94–3.35)              | < 0.0001 |
| Abdominal aortic aneurysm              | 0.46 (0.35–0.59)                                                                      | < 0.0001 | 0.49 (0.38–0.63)                       | < 0.0001 | 0.52 (0.40–0.67)              | < 0.0001 |
| Other death                            | 1.10 (1.05–1.17)                                                                      | 0.0004   | 1.01 (0.96–1.07)                       | 0.70     | 1.04 (0.992–1.09)             | 0.11     |

All analyses used the complete dataset with multiple imputation of missing covariate values. 'Risk factors' comprised body mass index, deprivation, high density lipoprotein cholesterol, total cholesterol, systolic blood pressure and smoking status.

**Table S6. Hazard ratios from complete case analyses**

| Initial presentation                   | Adjusted for age, sex, risk factors, statins and antihypertensives |          | Adjusted for age, sex and risk factors |          | Adjusted for age and sex only |          |
|----------------------------------------|--------------------------------------------------------------------|----------|----------------------------------------|----------|-------------------------------|----------|
|                                        | Hazard ratio (95% CI)                                              | P value  | Hazard ratio (95% CI)                  | P value  | Hazard ratio (95% CI)         | P value  |
| Stable angina                          | 2.03 (1.59–2.60)                                                   | < 0.0001 | 2.10 (1.65–2.67)                       | < 0.0001 | 2.10 (1.67–2.64)              | < 0.0001 |
| Unstable angina                        | 1.16 (0.78–1.73)                                                   | 0.45     | 1.28 (0.87–1.88)                       | 0.22     | 1.19 (0.83–1.72)              | 0.34     |
| Coronary disease not further specified | 1.64 (1.30–2.07)                                                   | < 0.0001 | 1.69 (1.35–2.13)                       | < 0.0001 | 1.75 (1.41–2.16)              | < 0.0001 |
| Non-fatal myocardial infarction        | 1.50 (1.17–1.93)                                                   | 0.0016   | 1.49 (1.16–1.90)                       | 0.0018   | 1.48 (1.17–1.88)              | 0.0011   |
| Unheralded coronary death              | 2.22 (1.43–3.46)                                                   | 0.0004   | 1.93 (1.24–3.02)                       | 0.0038   | 1.73 (1.16–2.59)              | 0.0070   |
| Heart failure                          | 3.01 (2.22–4.07)                                                   | < 0.0001 | 2.96 (2.19–3.99)                       | < 0.0001 | 3.29 (2.48–4.35)              | < 0.0001 |
| Arrhythmia or sudden cardiac death     | 0.92 (0.49–1.73)                                                   | 0.79     | 0.88 (0.47–1.63)                       | 0.68     | 0.83 (0.46–1.51)              | 0.55     |
| Transient ischaemic attack             | 1.33 (0.97–1.81)                                                   | 0.076    | 1.27 (0.93–1.73)                       | 0.13     | 1.20 (0.89–1.61)              | 0.23     |
| Ischaemic stroke                       | 1.61 (1.05–2.46)                                                   | 0.028    | 1.57 (1.03–2.40)                       | 0.034    | 1.47 (0.98–2.19)              | 0.060    |
| Stroke not further specified           | 1.16 (0.83–1.64)                                                   | 0.39     | 1.14 (0.81–1.60)                       | 0.46     | 1.22 (0.88–1.69)              | 0.23     |
| Subarachnoid haemorrhage               | –                                                                  | –        | –                                      | –        | –                             | –        |
| Intracerebral haemorrhage              | 1.20 (0.55–2.63)                                                   | 0.66     | 1.15 (0.53–2.50)                       | 0.73     | 0.93 (0.45–1.93)              | 0.85     |
| Peripheral arterial disease            | 3.05 (2.40–3.88)                                                   | < 0.0001 | 3.16 (2.50–4.01)                       | < 0.0001 | 2.80 (2.24–3.49)              | < 0.0001 |
| Abdominal aortic aneurysm              | 0.30 (0.14–0.67)                                                   | 0.0034   | 0.30 (0.14–0.65)                       | 0.0026   | 0.31 (0.14–0.66)              | 0.0026   |
| Other death                            | 1.63 (1.38–1.93)                                                   | < 0.0001 | 1.53 (1.29–1.80)                       | < 0.0001 | 1.45 (1.24–1.69)              | < 0.0001 |

These analyses were limited to the subset of individuals with completely recorded covariate information: 59 116 with no diabetes and 12 411 with type 2 diabetes. 'Risk factors' comprised body mass index, deprivation, high density lipoprotein cholesterol, total cholesterol, systolic blood pressure and smoking status.



**Table S7. Hazard ratios from secondary analyses**

| Initial presentation                   | Patients with any diabetes versus no diabetes |          | Type 2 diabetes versus no diabetes, restricted to patients entering study after 2004 |          |
|----------------------------------------|-----------------------------------------------|----------|--------------------------------------------------------------------------------------|----------|
|                                        | Hazard ratio (95% CI)                         | P value  | Hazard ratio (95% CI)                                                                | P value  |
| Stable angina                          | 1.70 (1.57–1.83)                              | < 0.0001 | 1.62 (1.17–2.23)                                                                     | 0.0030   |
| Unstable angina                        | 1.66 (1.47–1.87)                              | < 0.0001 | 1.30 (0.86–1.95)                                                                     | 0.21     |
| Coronary disease not further specified | 1.73 (1.60–1.87)                              | < 0.0001 | 1.33 (1.03–1.73)                                                                     | 0.031    |
| Non-fatal myocardial infarction        | 1.74 (1.62–1.86)                              | < 0.0001 | 1.48 (1.14–1.91)                                                                     | 0.0031   |
| Unheralded coronary death              | 1.81 (1.60–2.04)                              | < 0.0001 | 1.93 (1.31–2.84)                                                                     | 0.00098  |
| Heart failure                          | 1.76 (1.65–1.87)                              | < 0.0001 | 2.02 (1.55–2.63)                                                                     | < 0.0001 |
| Arrhythmia or sudden cardiac death     | 1.16 (0.97–1.39)                              | 0.11     | 1.10 (0.58–2.06)                                                                     | 0.78     |
| Transient ischaemic attack             | 1.54 (1.42–1.68)                              | < 0.0001 | 1.24 (0.91–1.69)                                                                     | 0.18     |
| Ischaemic stroke                       | 1.72 (1.54–1.92)                              | < 0.0001 | 1.42 (1.00–2.01)                                                                     | 0.051    |
| Stroke not further specified           | 1.80 (1.65–1.95)                              | < 0.0001 | 1.24 (0.99–1.56)                                                                     | 0.059    |
| Subarachnoid haemorrhage               | 0.54 (0.33–0.89)                              | 0.016    | –                                                                                    | –        |
| Intracerebral haemorrhage              | 1.40 (1.15–1.70)                              | 0.0007   | 1.10 (0.53–2.27)                                                                     | 0.80     |
| Peripheral arterial disease            | 3.33 (3.12–3.55)                              | < 0.0001 | 2.70 (2.12–3.44)                                                                     | < 0.0001 |
| Abdominal aortic aneurysm              | 0.49 (0.39–0.62)                              | < 0.0001 | 0.33 (0.15–0.72)                                                                     | 0.0056   |
| Other death                            | 1.39 (1.33–1.45)                              | < 0.0001 | 1.46 (1.29–1.64)                                                                     | < 0.0001 |

Hazard ratios were adjusted for age, sex, risk factors (body mass index, deprivation, high density lipoprotein cholesterol, total cholesterol, systolic blood pressure, smoking status), and statin and antihypertensive prescription in the year before study entry.

**Table S8. Hazard ratios for composite endpoints**

| Endpoint                 | Adjusted for age, sex, risk factors, statins and antihypertensives |          | Adjusted for age, sex and risk factors |          | Adjusted for age and sex only |          |
|--------------------------|--------------------------------------------------------------------|----------|----------------------------------------|----------|-------------------------------|----------|
|                          | Hazard ratio (95% CI)                                              | P value  | Hazard ratio (95% CI)                  | P value  | Hazard ratio (95% CI)         | P value  |
| Cardiovascular death     | 1.53 (1.45–1.62)                                                   | < 0.0001 | 1.62 (1.53–1.71)                       | < 0.0001 | 1.72 (1.64–1.81)              | < 0.0001 |
| Non-cardiovascular death | 1.29 (1.24–1.34)                                                   | < 0.0001 | 1.22 (1.17–1.26)                       | < 0.0001 | 1.25 (1.21–1.29)              | < 0.0001 |
| Death due to any cause   | 1.35 (1.31–1.39)                                                   | < 0.0001 | 1.31 (1.27–1.36)                       | < 0.0001 | 1.36 (1.32–1.40)              | < 0.0001 |

All analyses used the complete dataset with multiple imputation of missing covariate values. 'Risk factors' comprised body mass index, deprivation, high density lipoprotein cholesterol, total cholesterol, systolic blood pressure and smoking status.

## Supplementary Figures

**Figure S1. Patient flow diagram and classification of baseline diabetes status**

The aim of this algorithm is to identify patients with type 2 diabetes. The majority of diabetic patients in this cohort have type 2 diabetes, and we are not aiming to identify all patients with type 1 diabetes (this algorithm would not be suitable for a study focusing on type I diabetes). Our algorithm does not use any information after study entry to classify patients, in order to reduce immortal time bias. However this bias is not eliminated completely because specific type 1 or type 2 codes may have been entered retrospectively only for patients who survived.

Our algorithm leaves many patients with an unclassified type of diabetes. However, rather than using a more complex algorithm, we carried out sensitivity analyses with different definitions (e.g. the type 2 definition or any diabetes).

Lists of Read and ICD-10 diagnostic codes which convey diabetic status are curated on the CALIBER data portal (<https://www.caliberresearch.org/portal/chapter/6>).

### A. CALIBER phenotype algorithm for diabetes

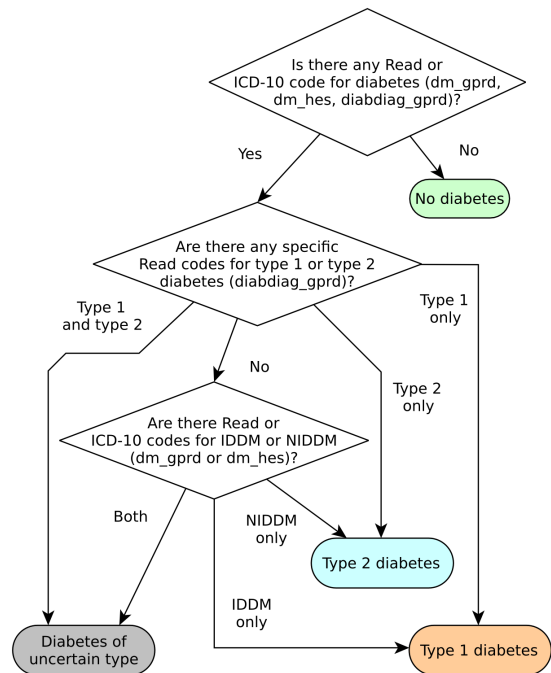

Consider diagnosis codes recorded in CPRD (Read) and HES (ICD-10) on or before the date on which diabetes status is to be ascertained.

### B. Patient flow diagram

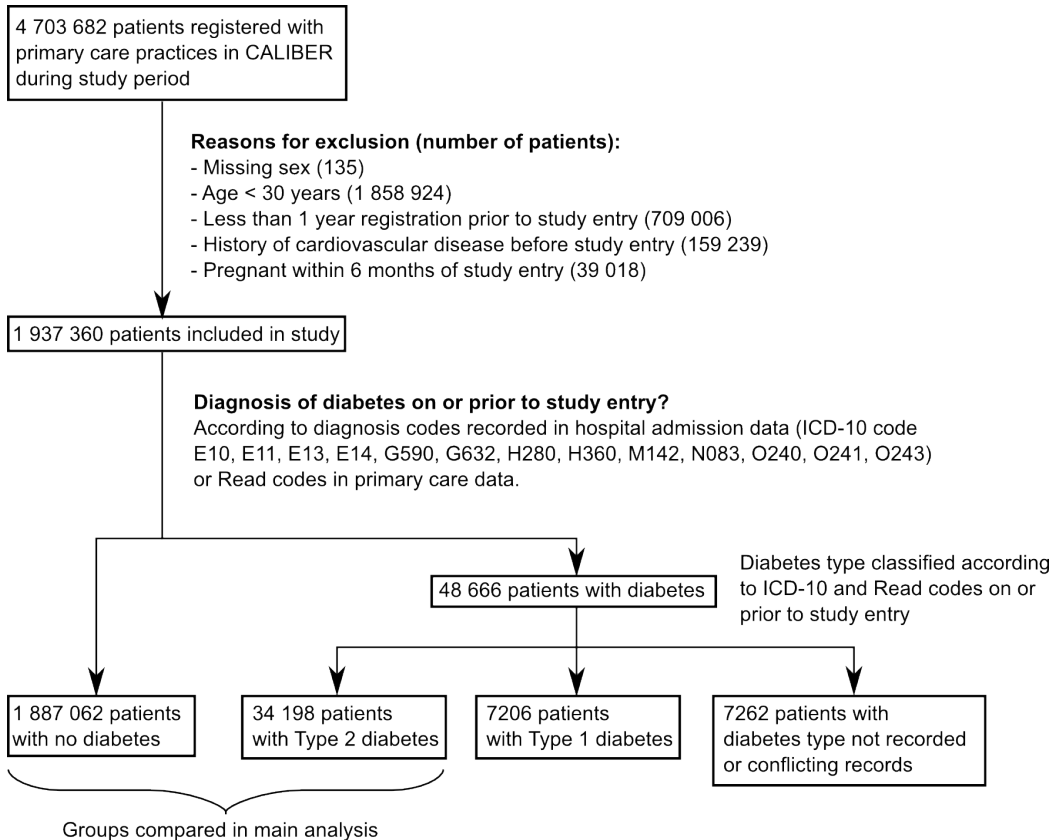

**Figure S2. Association of type 2 diabetes with initial presentation of cardiovascular diseases using different adjustments**

'Risk factors' adjustment includes age, sex, body mass index, deprivation, high density lipoprotein cholesterol, total cholesterol, systolic blood pressure, and smoking status. 'Treatment' includes statins and antihypertensive prescription in the year before study entry. P values \*\*\* < 0.001, \*\* < 0.01, \* < 0.05

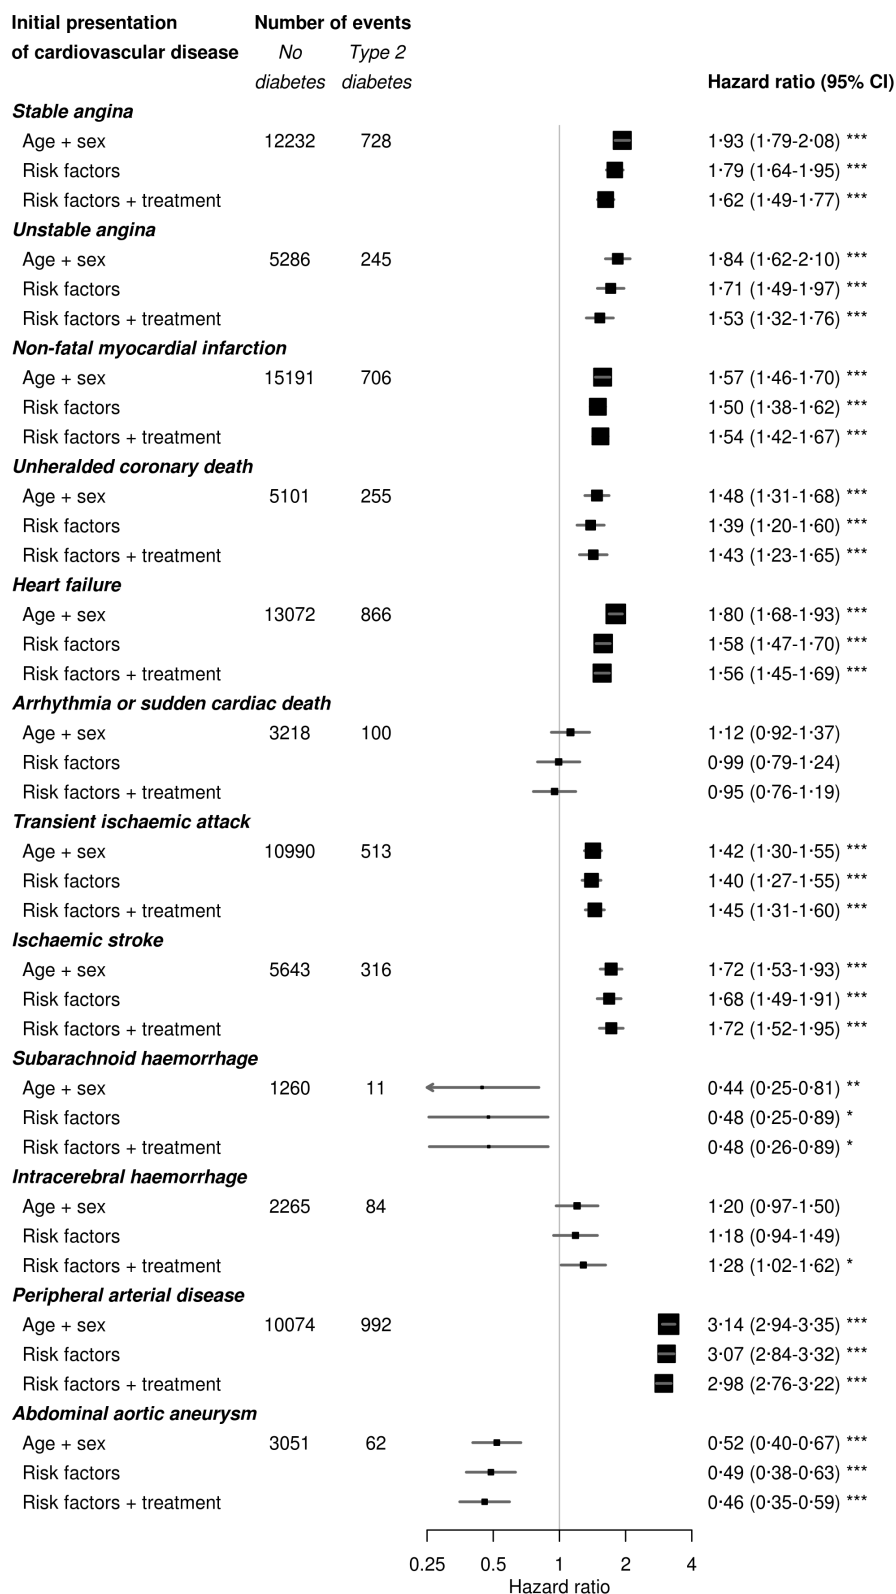

**Figure S3. Adjusted hazard ratios for type 2 diabetes and initial presentations of cardiovascular diseases by age group**

Hazard ratios by age group for the association of different initial presentations of cardiovascular disease with type 2 diabetes, adjusted for sex, body mass index, deprivation, high density lipoprotein cholesterol, total cholesterol, systolic blood pressure, smoking status, statins and antihypertensive prescriptions. P values \*\*\* < 0.001, \*\* < 0.01, \* < 0.05

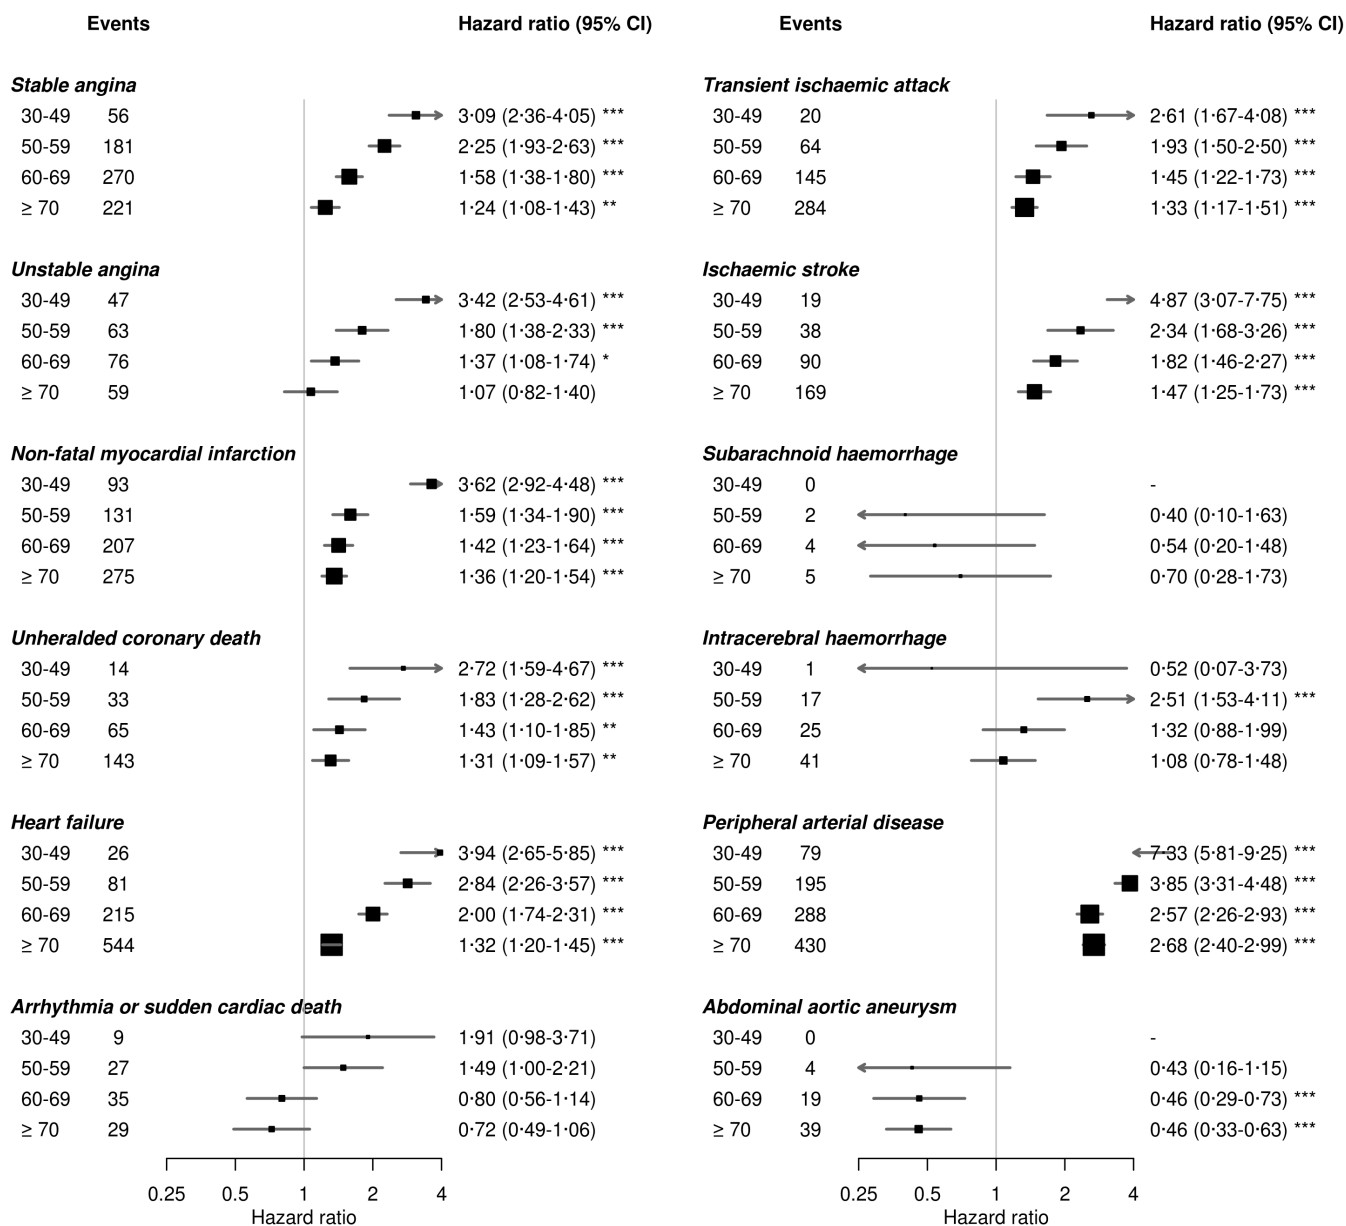

**Figure S4. Association of type 2 diabetes with initial presentation of cardiovascular diseases by level of glycaemic control.**

Hazard ratios for initial presentations of cardiovascular diseases associated with type 2 diabetes with different levels of HbA1c (mean in mmol/mol within 3 years of baseline), compared with no diabetes, adjusted for age, sex, body mass index, deprivation, high density lipoprotein cholesterol, total cholesterol, systolic blood pressure, smoking status, statins and antihypertensive prescriptions. P values \*\*\* < 0.001, \*\* < 0.01, \* < 0.05

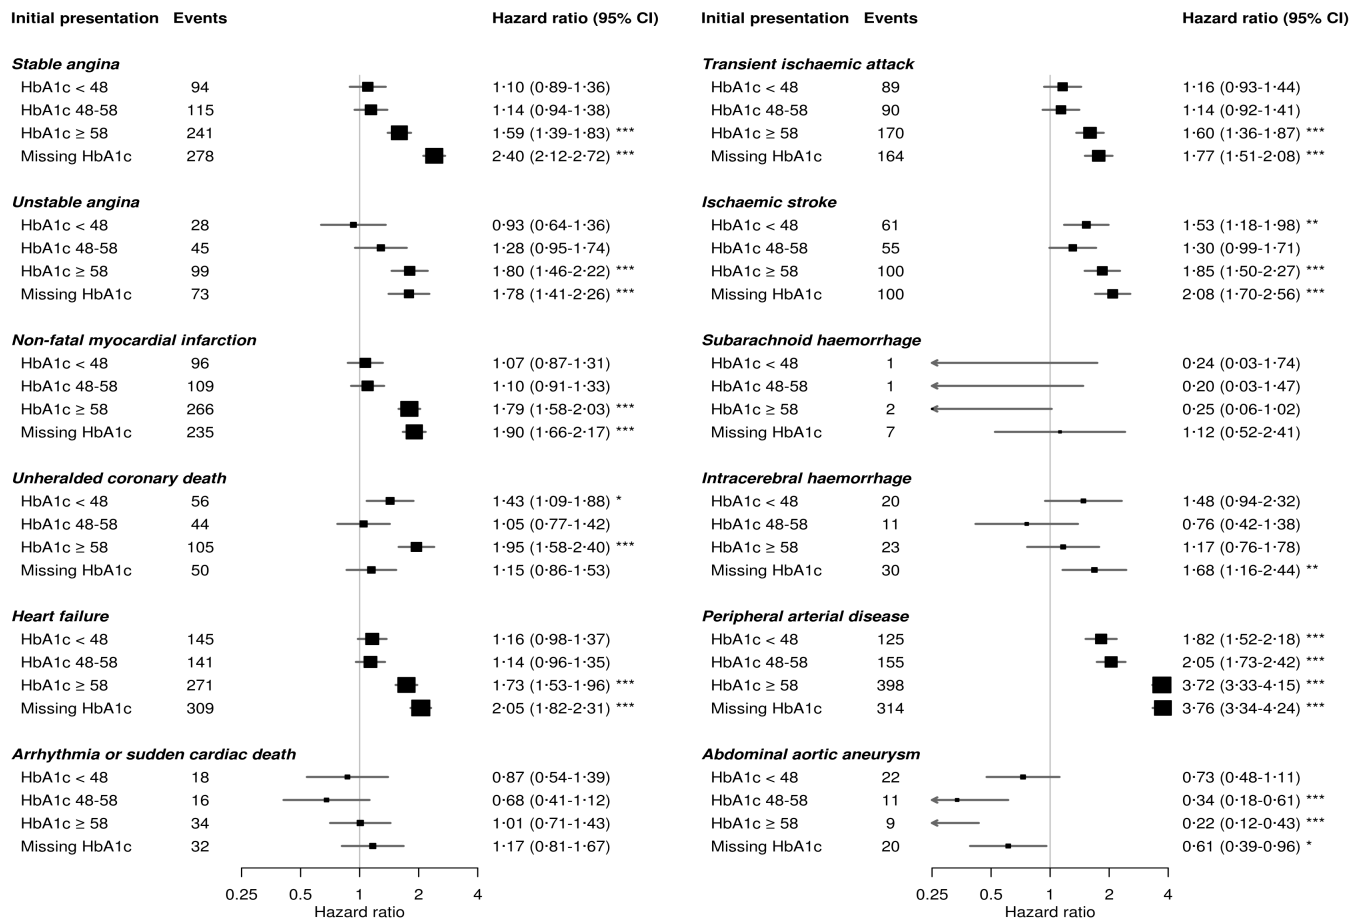

**Figure S5. Association of type 2 diabetes with initial presentation of cardiovascular diseases using different subsets of the data sources.**

Hazard ratios adjusted for age, sex, body mass index, deprivation, high density lipoprotein cholesterol, total cholesterol, systolic blood pressure, smoking status, statins and antihypertensive prescriptions. P values \*\*\* < 0.001, \*\* < 0.01, \* < 0.05

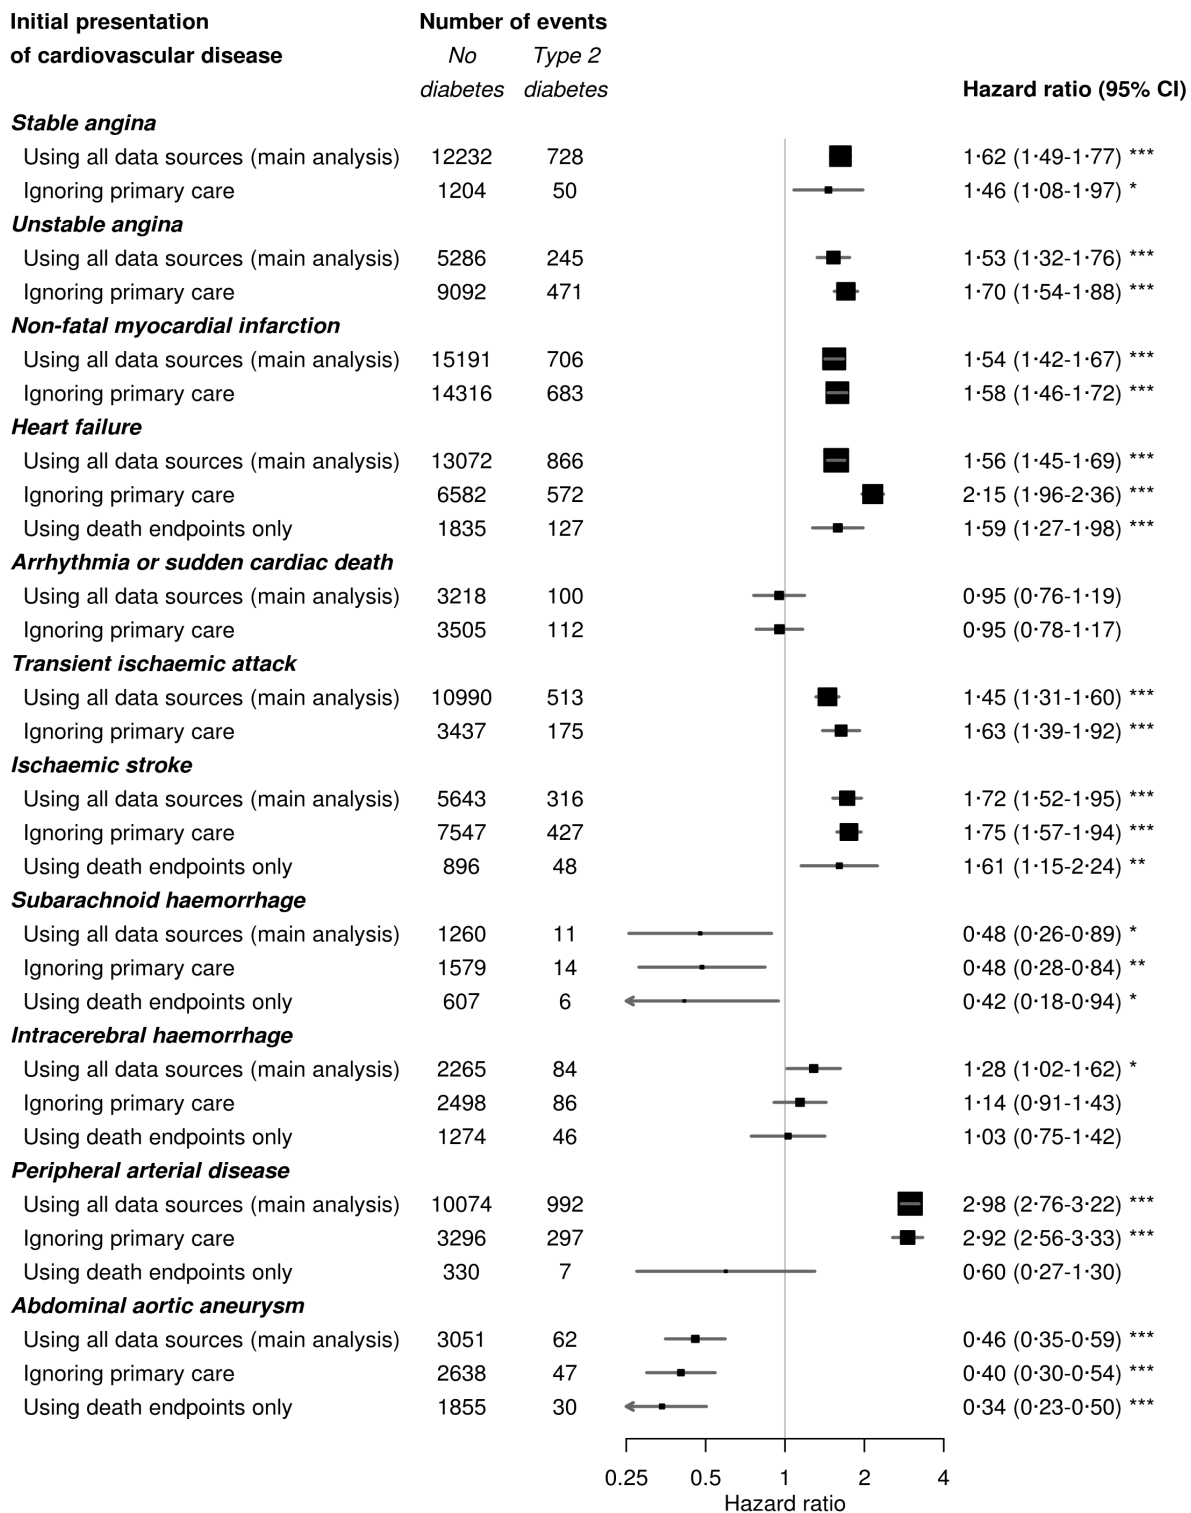

**Figure S6. Schoenfeld residuals and tests for proportional hazards**

Scaled Schoenfeld residuals for type 2 diabetes versus no diabetes, adjusted for age, sex, body mass index, deprivation, high density lipoprotein cholesterol, total cholesterol, systolic blood pressure, smoking status, statins and antihypertensive prescriptions. The lines show the estimate and 95% confidence interval for the beta coefficient for type 2 diabetes over time. The top left corner of each graph contains  $\rho$ ,  $\chi^2$  and p value for the correlation between transformed survival time and scaled Schoenfeld residuals. For clarity, points plotted on the graph are for a random sample of 20 000 patients rather than all 1.9 million.

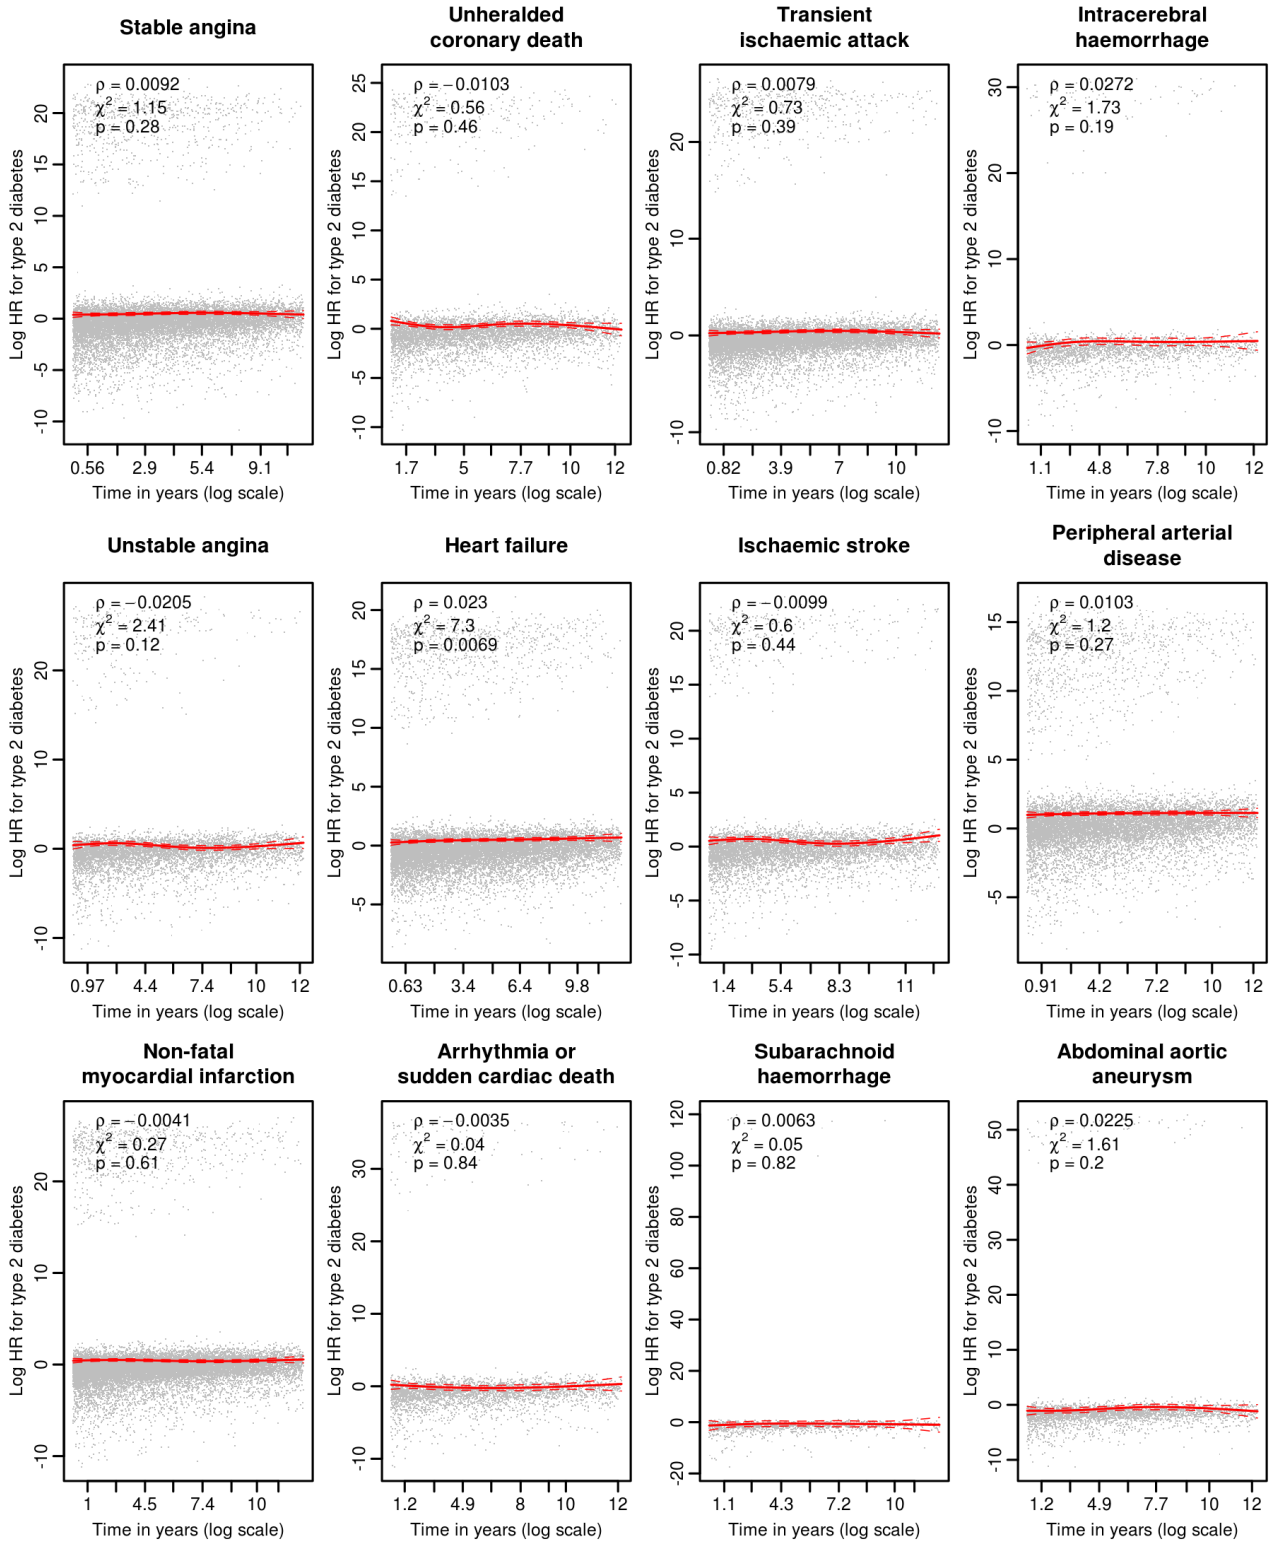

## References

1. Denaxas SC, George J, Herrett E, Shah AD, Kalra D, Hingorani AD, et al. Data resource profile: cardiovascular disease research using linked bespoke studies and electronic health records (CALIBER). *Int J Epidemiol.* 2012; 41: 1625-38.
2. Herrett E, Thomas SL, Schoonen WM, Smeeth L, Hall AJ. Validation and validity of diagnoses in the General Practice Research Database: a systematic review. *Br J Clin Pharmacol.* 2010;69(1):4-14. doi: 10.1111/j.1365-2125.2009.03537.x.
3. Hospital Episode Statistics. Health and Social Care Information Centre, Department of Health, UK. <http://www.hscic.gov.uk/hes>. Accessed January 15, 2014.
4. Herrett E, Smeeth L, Walker L, Weston C; MINAP Academic Group. The Myocardial Ischaemia National Audit Project (MINAP). *Heart.* 2010;96(16):1264-7. doi: 10.1136/hrt.2009.192328.
5. English indices of deprivation 2010: technical report. Department for Communities and Local Government, 2011. ISBN 9781409829225. <https://www.gov.uk/government/publications/english-indices-of-deprivation-2010-technical-report>. Accessed January 15, 2014.
6. Qiu W, Chavarro J, Lazarus R, Rosner B, Ma J (2012). powerSurvEpi: Power and sample size calculation for survival analysis of epidemiological studies. R package version 0.0.6. <http://CRAN.R-project.org/package=powerSurvEpi>
7. van Buuren S. Multiple imputation of discrete and continuous data by fully conditional specification. *Stat Methods Med Res.* 2007;16:219-242.
8. White IR, Royston P. Imputing missing covariate values for the Cox model. *Stat Med.* 2009; 28: 1982-1998.
9. The Action to Control Cardiovascular Risk in Diabetes Study Group. Effects of Intensive Glucose Lowering in Type 2 Diabetes. *N Engl J Med.* 2008; 358:2545-255. doi: 10.1056/NEJMoa0802743.
10. Parving HH, Brenner BM, McMurray JJ, et al. Cardiorenal end points in a trial of aliskiren for type 2 diabetes. *N Engl J Med.* 2012;367(23):2204-13. doi: 10.1056/NEJMoa1208799.
11. Green JB, Bethel MA, Paul SK, et al. Rationale, design, and organization of a randomized, controlled Trial Evaluating Cardiovascular Outcomes with Sitagliptin (TECOS) in patients with type 2 diabetes and established cardiovascular disease. *Am Heart J.* 2013 Dec;166(6):983-989.e7. doi: 10.1016/j.ahj.2013.09.003.
12. Scirica BM, Bhatt DL, Braunwald E, et al. Saxagliptin and cardiovascular outcomes in patients with type 2 diabetes mellitus. *N Engl J Med.* 2013;369(14):1317-26. doi: 10.1056/NEJMoa1307684.
13. Home PD, Pocock SJ, Beck-Nielsen H. et al. Rosiglitazone evaluated for cardiovascular outcomes—an interim analysis. *N Engl J Med.* 2007;357(1):28-38.
14. Young LH, Wackers FJT, Chyun DA. Cardiac Outcomes After Screening for Asymptomatic Coronary Artery Disease in Patients With Type 2 Diabetes The DIAD Study: A Randomized Controlled Trial. *JAMA.* 2009;301(15):1547-1555. doi:10.1001/jama.2009.476.
